# Supplementary material
Source: ML conference proceedings conference paper supplement (https://openreview.net/forum?id=rdT5GV-LnZU)
Supplement: supplementary_material [file attachment]

## A Training Details

Table 1: Hyperparameters for BERT and RoBERTa in all downstream tasks. LR: learning rate; BSZ: batch size; EP: training epochs; WP: warmup proportion; MSL: maximum sequence length; GLR: generator learning rate; DS: dropout step.

|         | LR   | BSZ | EP | WP   | MSL | GLR  | DS |
|---------|------|-----|----|------|-----|------|----|
| SST-2   | 1e-5 | 32  | 3  | 0.06 | 128 | 5e-5 | 12 |
| MRPC    | 2e-5 | 32  | 10 | 0.06 | 128 | 5e-5 | 12 |
| QNLI    | 1e-5 | 32  | 3  | 0.06 | 128 | 5e-5 | 12 |
| MNLI-mm | 3e-5 | 32  | 3  | 0.1  | 128 | 5e-5 | 15 |
| CoLA    | 1e-5 | 16  | 10 | 0.06 | 128 | 5e-5 | 10 |
| IMDB    | 3e-5 | 32  | 10 | 0.1  | 256 | 5e-5 | 12 |
| CoNLL03 | 5e-5 | 32  | 5  | 0.1  | 128 | 1e-4 | 8  |
| PTB     | 5e-5 | 32  | 5  | 0.1  | 128 | 1e-4 | 8  |
| SWAG    | 2e-5 | 16  | 3  | 0    | 128 | 5e-5 | 15 |

## B Resource Usage

Table 2: Resource Usage for AttendOut on RoBERTa-base. MS: model size; GS: generator size; MU: memory usage; ET: epoch time.

|                     | MS   | GS  | MU    | ET      |
|---------------------|------|-----|-------|---------|
| RoBERTa             | 119M | -   | 10.6G | 8.5mins |
| RoBERTa + AttendOut | 119M | 40M | 18.9G | 18mins  |
